# Supplementary material
Source: HighWire-hosted journal article supplement (https://bmjopen.bmj.com/content/9/2/e027317)
Supplement: inline-supplementary-material-1 [file inline-supplementary-material-1.pdf]

# Use of an individual-patient database for analysing caesarean section practices according to the WHO Manual for Robson classification and for developing quality improvement recommendations: a study in Sri Lanka

## [Supplementary file](#)

### Table of Contents

|                                                                                                                                                          |    |
|----------------------------------------------------------------------------------------------------------------------------------------------------------|----|
| Supplementary Table 1. Missing cases for the variables of interest .....                                                                                 | 2  |
| Supplementary Table 2. Steps to assess quality of data using the Robson Classification Report Table according to WHO implementation manual.....          | 3  |
| Supplementary Table 3. Steps to assess type of population using the Robson Classification Report Table according to WHO implementation manual .....      | 4  |
| Supplementary Table 4. Steps to assess caesarean section rates using the Robson Classification Report Table according to WHO implementation manual ..... | 7  |
| Supplementary Table 5. Template for agreeing actions at hospital level to improve the quality of care .....                                              | 10 |
| Supplementary Table 6. Characteristics of the population .....                                                                                           | 12 |
| Supplementary Table 7. Main indications to CS .....                                                                                                      | 14 |
| Supplementary Table 8. Main indications to CS by Robson group.....                                                                                       | 15 |

Supplementary Table 1. Missing cases for the variables of interest

| Variables                                      | Total | Missing | % Missing |
|------------------------------------------------|-------|---------|-----------|
| Maternal age                                   | 7504  | 34      | 0.4       |
| Parity                                         | 7504  | 34      | 0.4       |
| Gestational age at delivery                    | 7504  | 47      | 0.6       |
| Previous caesarean section                     | 7504  | 38      | 0.5       |
| If previous caesarean section, trial of labour | 7504  | 91      | 1.2       |
| Multiple pregnancies                           | 7504  | 35      | 0.4       |
| Presentation                                   | 7504  | 43      | 0.6       |
| Labour onset                                   | 7504  | 36      | 0.4       |
| Delivery                                       | 7504  | 32      | 0.4       |
| Delivery mode                                  | 7504  | 37      | 0.4       |
| If operative delivery, indication              | 7504  | 38      | 0.5       |
| If caesarean section, type                     | 7504  | 37      | 0.4       |
| Indication of labour                           | 7504  | 36      | 0.4       |
| Mode of induction                              | 7504  | 42      | 0.5       |
| Pre-gestational diabetes                       | 7504  | 35      | 0.4       |
| Gestational diabetes mellitus in diet          | 7504  | 35      | 0.4       |
| Gestational diabetes mellitus in drug therapy  | 7504  | 36      | 0.4       |
| Pre-gestational hypertension                   | 7504  | 33      | 0.4       |
| Gestational hypertension (no proteinuria)      | 7504  | 35      | 0.4       |
| Pre-eclampsia not severe                       | 7504  | 35      | 0.4       |
| Pre-eclampsia severe                           | 7504  | 35      | 0.4       |
| Eclampsia                                      | 7504  | 34      | 0.4       |
| BMI                                            | 7504  | 53      | 0.7       |
| Maternal cardiac disease                       | 7504  | 34      | 0.4       |
| Polyhydramnios                                 | 7504  | 36      | 0.4       |
| Oligohydramnios                                | 7504  | 38      | 0.4       |
| IUGR                                           | 7504  | 36      | 0.4       |
| APH/major placenta previa                      | 7504  | 37      | 0.4       |
| Severe anaemia                                 | 7504  | 38      | 0.5       |
| Chorioamnionitis                               | 7504  | 36      | 0.4       |

Abbreviation: APH= Antepartum haemorrhage; BMI= Body mass index; IUGR= Intrauterine growth restriction.

## Supplementary Table 2. Steps to assess quality of data <sup>1</sup>

| Step                                                                       | Interpretation by Robson                                                                             | Example: MCS population* | Further Interpretation                                                                                                                                                                                                                                                                                                                                 |
|----------------------------------------------------------------------------|------------------------------------------------------------------------------------------------------|--------------------------|--------------------------------------------------------------------------------------------------------------------------------------------------------------------------------------------------------------------------------------------------------------------------------------------------------------------------------------------------------|
| 1. Look at the total numbers of CS and of women delivered in your hospital | These numbers should be identical to the total number of CS and of women delivered in your hospital. | NA                       | If these numbers do not match, then data is missing or incorrect. Some women may not have been classified in the Robson groups because of missing variables or were incorrectly classified as to type of delivery. Sometimes multiple pregnancies are counted as babies rather than mothers.                                                           |
| 2. Look at the size of Group 9. Singletons in transverse or oblique lie    | It should be less than 1%.                                                                           | 0.4%                     | If this is > 1%, it is probable that women with breech (or other) presentations have been misclassified as transverse /oblique lie and allocated to this group. As the classification includes all women who have delivered, if any one group is smaller or bigger, look to the other groups which sometimes will show where the misclassification is. |
| 3. Look at the CS rate of Group 9                                          | It should be 100% by convention.                                                                     | 88.6%                    | By convention, if the woman gives birth vaginally by internal version, it should be classified as either cephalic or breech. The CS rate in Group 9 should be 100%                                                                                                                                                                                     |

Notes: \*MCS reference population was the population of the MCS with relatively low CS rates and, at the same time, with good outcomes of labour and childbirth.

Abbreviations: CS= caesarean section; NA= not available.

<sup>1</sup> World Health Organization. Robson Classification: Implementation Manual. Geneva, 2017.[http://www.who.int/reproductivehealth/publications/maternal\\_perinatal\\_health/robson-classification/en/](http://www.who.int/reproductivehealth/publications/maternal_perinatal_health/robson-classification/en/) (accessed 28 June 2018)

Supplementary Table 3. Steps to assess type of population <sup>1</sup>

| Step                                                                                                               | Interpretation by Robson                                                                                                                                                      | Example: MCS population* | Further Interpretation                                                                                                                                                                                                                                                                                                                                    |
|--------------------------------------------------------------------------------------------------------------------|-------------------------------------------------------------------------------------------------------------------------------------------------------------------------------|--------------------------|-----------------------------------------------------------------------------------------------------------------------------------------------------------------------------------------------------------------------------------------------------------------------------------------------------------------------------------------------------------|
| 1. Look at the size of Groups 1 + Group 2. Nulliparous women ≥37 weeks gestation singleton cephalic                | This usually represents 35-42% of obstetric population of most hospitals.                                                                                                     | 38.1%                    | In settings with high proportion of women who have only one child rather than more than one child, the group of nulliparous women i.e. Groups 1 and 2 tends to be larger. In settings where the opposite is true, the size of Groups 1 + Group 2 will be smaller since most of the population will be represented by multiparous women.                   |
| 2. Look at the size of Groups 3 + 4 -Multiparous women ≥37 weeks gestation singleton cephalic, without previous CS | This usually represents about 30% of women.                                                                                                                                   | 46.5%                    | In settings with high proportion of women with more than one child rather than only one child, the size of Groups 3 + Group 4 will be higher than 30% (provided they have delivered vaginally). Another reason for a low size of Groups 3 and 4 could be that the size of Group 5 is very high which would be accompanied by a very high overall CS rate. |
| 3. Look at the size of Group 5 - Multiparous women ≥37 weeks gestation singleton cephalic with previous CS         | It is related to the overall CS rate. The size of Group 5 is roughly usually about half of the total CS rate. In settings with low overall CS rates, it is usually under 10%. | 7.2%                     | The size of Group 5 is usually related to the overall CS rate. If the size of this group is larger, it means that there has been a high CS rate in the past years in that hospital and mainly in Groups 1 and 2. In places with high CS rates, the size of this group could be > 15%.                                                                     |
| 4. Look at the size of Groups 6 + 7 Breeches in nulliparous & multiparous women                                    | It should be 3-4%                                                                                                                                                             | 2.7%                     | If the total is much over 4%, the most common reason is usually a high rate of preterm deliveries or a higher proportion of nulliparous women. Therefore, look at size of Group 10. If that is over 4-5%, this hypothesis                                                                                                                                 |

<sup>1</sup> World Health Organization. Robson Classification: Implementation Manual. Geneva, 2017.[http://www.who.int/reproductivehealth/publications/maternal\\_perinatal\\_health/robson-classification/en/](http://www.who.int/reproductivehealth/publications/maternal_perinatal_health/robson-classification/en/) (accessed 28 June 2018)

|                                                                                                                                                                                                                                      |                                                         |           |                                                                                                                                                                                                                                                                                                                                                                                                                                                                                                                                                                                                                                                                                                                  |
|--------------------------------------------------------------------------------------------------------------------------------------------------------------------------------------------------------------------------------------|---------------------------------------------------------|-----------|------------------------------------------------------------------------------------------------------------------------------------------------------------------------------------------------------------------------------------------------------------------------------------------------------------------------------------------------------------------------------------------------------------------------------------------------------------------------------------------------------------------------------------------------------------------------------------------------------------------------------------------------------------------------------------------------------------------|
|                                                                                                                                                                                                                                      |                                                         |           | could be true.                                                                                                                                                                                                                                                                                                                                                                                                                                                                                                                                                                                                                                                                                                   |
| 5. Look at the size of Groups 8 - Multiples                                                                                                                                                                                          | It should be 1.5-2%                                     | 0.9%      | If it is higher, the hospital is probably tertiary (high risk, referral) or runs a fertilization program. If lower, probably a lot of the twins are referred out especially if the remaining twins have a low caesarean section rate                                                                                                                                                                                                                                                                                                                                                                                                                                                                             |
| 6. Look at the size of Groups 10 - Preterm cephalic singletons                                                                                                                                                                       | It should be less than 5% in most normal risk settings. | 4.2%      | If it is higher, the hospital is probably tertiary (high risk, referral) or there is a high risk of preterm births in the population that the hospital serves. If, in addition, the CS rate is low in this group, it could represent a preponderance of spontaneous preterm labour. If the CS rate in this group is high, it could suggest more provider-initiated pre-labour CS for foetal growth restriction or pre-eclampsia and other pregnancy or medical complications.                                                                                                                                                                                                                                    |
| 7. Look at the Ratio of the size of Group 1 versus Group 2 (Divide the size of Group 1 by the size of Group 2) - Nullipara term cephalic singletons spontaneous labour / Nullipara term cephalic singletons induced or pre-labour CS | It is usually 2:1 or higher                             | Ratio 3.3 | If it is lower, suspect poor data quality: nulliparous women who received oxytocin for augmentation (acceleration) of labour (and should be in Group 1) may have been misclassified as "induction" (and incorrectly classified as Group 2).<br>If data collection is correct, a lower ratio may indicate that you have a high induction/prelabour CS issue which may indicate a high-risk population in nulliparous women and are likely therefore to have a high CS rate. Additional information on pre-labour stillbirths would be the next question to ask.<br>On the contrary, if the ratio is very high, you may want to look at your pre-labour stillbirth rate in this population which may indicate that |

|                                                                                                                                                                                                                                                                                |                                                                                                                                                                                                |           |                                                                                                                                                                                                                                                                                                                                                                                                                                                                                                                                          |
|--------------------------------------------------------------------------------------------------------------------------------------------------------------------------------------------------------------------------------------------------------------------------------|------------------------------------------------------------------------------------------------------------------------------------------------------------------------------------------------|-----------|------------------------------------------------------------------------------------------------------------------------------------------------------------------------------------------------------------------------------------------------------------------------------------------------------------------------------------------------------------------------------------------------------------------------------------------------------------------------------------------------------------------------------------------|
|                                                                                                                                                                                                                                                                                |                                                                                                                                                                                                |           | you are not inducing enough. Or alternatively you may have a very low risk population                                                                                                                                                                                                                                                                                                                                                                                                                                                    |
| 8. Look at the Ratio of the size of Group 3 versus Group 4. (Divide the size of Group 3 by the size of Group 4): Multipara without previous CS, term cephalic singletons spontaneous labour / Multipara without previous CS, term cephalic singletons induced or pre-labour CS | It is always higher than the ratio of Group 1/Group 2 in the same institution, i.e, larger than 2:1. This is very reliable finding in confirming data quality and culture of the organization. | Ratio 6.3 | If it is lower, suspect poor data quality: multiparous women who received oxytocin for “augmentation” of labour (and should be in Group 3) may have been misclassified as “induction” (and incorrectly classified as Group 4). A low ratio (due to large Group 4b) may suggest a poor previous maternal experience in vaginal delivery and a request for pre-labour CS in multiparous women. Another explanation may be pre-labour CS done to perform tubal ligation (common in settings where family planning is not easily available). |
| 9. Look at the Ratio of the size of Group 6 versus Group 7. (Divide the size of Group 6 by the size of Group 7) Nullipara breech / Multipara breech                                                                                                                            | It is usually a 2:1 because breeches are more frequent in nulliparous women than in multiparous women.                                                                                         | Ratio 0.8 | If the ratio is different, suspect either unusual nullipara/multipara ratio or inaccurate data collection.                                                                                                                                                                                                                                                                                                                                                                                                                               |

Notes: \*MCS reference population was the population of the MCS with relatively low CS rates and, at the same time, with good outcomes of labour and childbirth.

Abbreviation: CS= caesarean section.

Supplementary Table 4. Steps to assess caesarean section rates <sup>1</sup>

| Step                               | Interpretation by Robson            | Example: MCS population* | Further Interpretation                                                                                                                                                                                                                                                                                                                                                                                                                                                                                                                                             |
|------------------------------------|-------------------------------------|--------------------------|--------------------------------------------------------------------------------------------------------------------------------------------------------------------------------------------------------------------------------------------------------------------------------------------------------------------------------------------------------------------------------------------------------------------------------------------------------------------------------------------------------------------------------------------------------------------|
| 1. Look at the CS rate for Group 1 | Rates under 10% are achievable      | 9.8%                     | This rate can only be interpreted accurately when you have considered the ratio of the sizes of Groups 1 and 2. In principle, the higher the ratio of size of Groups 1:2, the higher the likelihood of both the CS rate in Group 1 and 2 being individually higher. However, the overall CS rate in Groups 1 and 2 combined may still be low or the same.                                                                                                                                                                                                          |
| 2. Look at the CS rate for Group 2 | Consistently around 20-35%          | 39.9%                    | CS rates in Group 2 reflect the size and rates in 2a and 2b. If size of Group 2b is large, the overall CS rates in Group 2 is also going to be large. If Group 2b is relatively small, then high rates of CS in Group 2 may indicate poor success rates for induction or poor choice of women to induce and consequently a high rate of CS in Group 2a. Remember the general principle of not interpreting one single subgroup on its own without knowing what is left out. The interpretation of group 2a requires knowing the relative sizes of Groups 1 and 2b. |
| 3. Look at the CS rate for Group 3 | Normally, no higher than 3.0%.      | 3.0%                     | In units with higher CS rates in this group, this may be due to poor data collection. It is possible that women with previous scars (Group 5) were incorrectly classified as Group 3. Other possible reasons for high rates could be for example to do tubal ligation in settings with poor access to contraception, or maternal request.                                                                                                                                                                                                                          |
| 4. Look at the CS rate for Group 4 | It rarely should be higher than 15% | 23.7%                    | CS rates in Group 4 reflect the size and rates in 4a and 4b. If size of Group 4b is large, the overall CS rates in Group 4 is also going to be high. If Group 4b is relatively small, then high rates of CS in Group 4 may indicate poor success rates for induction or poor choice of women to induce and consequently a high rate of CS in Group 4a.<br>Poor data collection could also be a reason for high                                                                                                                                                     |

<sup>1</sup> World Health Organization. Robson Classification: Implementation Manual. Geneva, 2017.[http://www.who.int/reproductivehealth/publications/maternal\\_perinatal\\_health/robson-classification/en/](http://www.who.int/reproductivehealth/publications/maternal_perinatal_health/robson-classification/en/) (accessed 28 June 2018)

|                                                                                                                                 |                                                                                                     |                                                            |                                                                                                                                                                                                                                                                                                                                                                                                                           |
|---------------------------------------------------------------------------------------------------------------------------------|-----------------------------------------------------------------------------------------------------|------------------------------------------------------------|---------------------------------------------------------------------------------------------------------------------------------------------------------------------------------------------------------------------------------------------------------------------------------------------------------------------------------------------------------------------------------------------------------------------------|
|                                                                                                                                 |                                                                                                     |                                                            | CS rates in Group 4; for example, due to inclusion of women with previous scars in this group (when they should be in Group 5). Lastly, a high CS rate in Group 4 may reflect a high maternal request for CS even if these women have delivered their first pregnancy vaginally. This may be because of a previously traumatic or prolonged labour or to do tubal ligation in settings with poor access to contraception. |
| 5. Look at the CS rate for Group 5                                                                                              | Rates of 50-60% are considered appropriate provided you have good maternal and perinatal outcome.   | 74.4%                                                      | If rates are higher, this is possibly due to a large Group 5.2 (women with 2 or more previous CS). This could also be due to a policy of scheduling pre-labour CS for all women with 1 previous scar without attempting a trial of labour.                                                                                                                                                                                |
| 6. Look at the CS rate for Group 8                                                                                              | It is usually around 60%.                                                                           | 57.7%                                                      | Variations will depend on the type of twin pregnancy and the ratio of nulliparous/multiparous with or without a previous scar.                                                                                                                                                                                                                                                                                            |
| 7. Look at the CS rate in Group 10                                                                                              | In most populations it is usually around 30%                                                        | 25.1%                                                      | If higher than 30%, it is usually due to many cases of high risk pregnancies (e.g. foetal growth restriction, preeclampsia) that will need preterm pre-labour CS. If lower than 30%, it suggests a relatively higher rate of preterm spontaneous labour and hence a lower overall CS rate.                                                                                                                                |
| 8. Look at the relative contribution of Groups 1, 2 and 5 to the overall CS rate (add the contribution of each of these groups) | These three groups combined normally contribute to 2/3 (66%) of all CS performed in most hospitals. | These three groups combined contributed to 63.7% of all CS | These three groups should be the focus of attention if the hospital is trying to lower the overall CS rate. The higher the overall CS rate, the greater the focus should be in Group 1.                                                                                                                                                                                                                                   |
| 9. Look at the absolute contribution of Group 5 to the overall                                                                  |                                                                                                     | This group was responsible for 28.9% of all CS             | If it is very high, this may indicate that in previous years, CS rates in Groups 1 and 2 have been high and it is worth exploring further.                                                                                                                                                                                                                                                                                |



|         |  |  |  |
|---------|--|--|--|
| CS rate |  |  |  |
|---------|--|--|--|

Notes: \*MCS reference population was the population of the MCS with relatively low CS rates and, at the same time, with good outcomes of labour and childbirth.

Abbreviation: CS= caesarean section.

Supplementary Table 5. Template for agreeing actions at hospital level to improve the quality of care

Date:

Group Participants:

| Key findings from the analysis | Possible explanations | Agreed recommendations for quality improvement |
|--------------------------------|-----------------------|------------------------------------------------|
|                                |                       |                                                |
|                                |                       |                                                |
|                                |                       |                                                |
|                                |                       |                                                |
|                                |                       |                                                |
|                                |                       |                                                |
|                                |                       |                                                |
|                                |                       |                                                |
|                                |                       |                                                |
|                                |                       |                                                |

### Instructions:

1. Identify a moderator whose duty is to make sure that the pre-defined template is filled in pre-established time (90 minutes total), that everyone has the right to speak and actively participate, and that the final version of the table corresponds to group opinions
2. Identify a secretary whose job is to take notes, summarize the opinions of the group in the template, act as a presenter in plenary (15 min maximum), save the template in an electronic file (the results will be attached to final report that will be distributed)
3. Participants are requested to make concise and specific interventions lasting up to 1-2 minutes, leaving the possibility to express their opinions to others. It is required to make proposals with a problem-solving attitude
4. We recommend to fill the first column first (key findings) and then the other lines in horizontal
5. Is not necessary to identify many priorities, 5-10 are enough. For the same priority it's possible to specify 1 or more actions
6. Some examples of different possible actions:
  - *development of policies and operational plans (for training, quality, work conditions, improve data collection and other aspects of database)*
  - *development of protocols and procedures*
  - *theoretical and practical training (related to EBM clinical practices or quality of care)*
  - *periodical audit (clinical, on indicators) or team meetings*
  - *adopt quality standards and targets and implement a monitoring system with periodic analyzes and discussions of data*

Actions should be **SMART: Specific, Measurable, Achievable, Realistic, Time-bound** in the real context of the hospital.

Supplementary Table 6. Characteristics of the population

| Population                                              | n<br>(N=7504) | %    |
|---------------------------------------------------------|---------------|------|
| Maternal age                                            |               |      |
| <18 years                                               | 95            | 1.2  |
| 18-24 years                                             | 1862          | 24.8 |
| 25-34 years                                             | 4253          | 56.6 |
| 35-39 years                                             | 1036          | 13.8 |
| >40 years                                               | 224           | 2.9  |
| Parity                                                  |               |      |
| 0                                                       | 3342          | 44.5 |
| ≥1                                                      | 4128          | 55.0 |
| Gestational age                                         |               |      |
| <28 weeks                                               | 41            | 0.5  |
| 28-31 weeks                                             | 96            | 1.3  |
| 32-36 weeks                                             | 571           | 7.6  |
| >37 weeks                                               | 6749          | 89.9 |
| Previous caesarean section                              | 956           | 12.7 |
| Cephalic                                                | 7122          | 94.9 |
| Breech                                                  | 273           | 3.6  |
| Other                                                   | 66            | 0.9  |
| Multiple pregnancies                                    | 84            | 1.1  |
| Labour onset                                            |               |      |
| Spontaneous                                             | 4726          | 62.9 |
| Induction                                               | 1849          | 24.6 |
| Pre-labour caesarean section                            | 893           | 11.9 |
| Mode of delivery                                        |               |      |
| Vaginal spontaneous                                     | 4906          | 65.3 |
| Vaginal operative                                       | 310           | 4.1  |
| Caesarean section                                       | 2251          | 30.0 |
| At least one maternal or foetal pathological conditions | 2845          | 37.9 |
| Pre-gestational diabetes                                | 266           | 3.5  |
| Gestational diabetes, total                             | 1002          | 13.4 |
| On diet                                                 | 417           | 5.6  |
| On drug therapy                                         | 585           | 7.8  |
| Hypertensive disorders of pregnancy, any                | 506           | 6.7  |
| Pre-gestational hypertension                            | 168           | 2.2  |
| Gestational hypertension                                | 179           | 2.4  |
| Pre-eclampsia not severe                                | 78            | 1.0  |
| Pre-eclampsia severe                                    | 69            | 0.9  |

|                           |     |     |
|---------------------------|-----|-----|
| Eclampsia                 | 12  | 0.2 |
| Obesity (BMI > 27.5)*     | 440 | 5.9 |
| Maternal age > 40 years   | 224 | 2.9 |
| Maternal cardiac disease  | 234 | 3.1 |
| Oligohydramnios           | 131 | 1.8 |
| Polyhydramnios            | 96  | 1.3 |
| IUGR**                    | 504 | 6.7 |
| APH/major placenta previa | 112 | 1.5 |
| Severe anaemia (Hb <7)    | 40  | 0.5 |
| Chorioamnionitis          | 11  | 0.2 |

Notes: \*as defined on data collection form; \*\*defined as weight < 10 centile of estimated weight for gestational age or < 10 centile for abdominal circumference (Bangladesh growth chart), based on ultrasound.

Abbreviation: APH= Antepartum haemorrhage; BMI= Body mass index; Hb= Haemoglobin; IUGR= Intrauterine growth restriction.

Supplementary Table 7. Main indications to CS

| Main indication                               | n<br>(N=2251) | %    |
|-----------------------------------------------|---------------|------|
| CTG abnormal/suspected foetal distress        | 610           | 27.1 |
| Past caesarean section                        | 538           | 23.9 |
| Failure to progress or failed IOL             | 261           | 11.6 |
| Failed IOL                                    | 109           | 4.8  |
| Dystocia 1st stage                            | 77            | 3.4  |
| Dystocia 2nd stage                            | 75            | 3.3  |
| Breech/abnormal lie                           | 184           | 8.2  |
| Hypertension/preeclampsia/eclampsia           | 100           | 4.4  |
| IUGR                                          | 82            | 3.6  |
| APH/major placenta previa                     | 68            | 3.0  |
| Prelabour diagnosis of CPD                    | 57            | 2.5  |
| History of subfertility/bad obstetric history | 47            | 2.1  |
| Cardiac disease                               | 45            | 2.0  |
| Maternal request                              | 43            | 1.9  |
| Multiple pregnancies                          | 40            | 1.8  |
| Diabetes                                      | 25            | 1.1  |
| Thick meconium                                | 16            | 0.7  |
| Pre-term                                      | 10            | 0.4  |
| Other                                         | 118           | 5.2  |
| Missing                                       | 7             | 0.3  |

Abbreviation: APH= Antepartum haemorrhage; CPD= Cephalopelvic disproportion; CTG= Cardiotocography; IOL= induction of labour; IUGR= Intrauterine growth restriction.

Supplementary Table 8. Main indications to CS by Robson group

| Robson group                                  | 1          | 2a         | 2b         | 3          | 4a        | 4b        | 5          | 6          | 7         | 8         | 9         | 10         | Missing  | Total       |
|-----------------------------------------------|------------|------------|------------|------------|-----------|-----------|------------|------------|-----------|-----------|-----------|------------|----------|-------------|
| <b>Main indication</b>                        |            |            |            |            |           |           |            |            |           |           |           |            |          |             |
| CTG abnormal/suspected foetal distress        | 155        | 175        | 48         | 60         | 49        | 9         | 49         | 5          | 6         | 3         | 2*        | 48         | 1        | 610         |
| Past caesarean section                        | 0          | 0          | 0          | 3*         | 0         | 1*        | 467        | 6          | 18        | 2         | 7*        | 34         | 0        | 538         |
| Failure to progress or failed induction       |            |            |            |            |           |           |            |            |           |           |           |            |          |             |
| Failed induction                              | 0          | 63         | 0          | 0          | 21        | 0         | 15         | 0          | 1         | 1         | 0         | 8          | 0        | 109         |
| Dystocia 1st stage                            | 27         | 27         | 2          | 8          | 3         | 3*        | 3          | 0          | 1         | 0         | 0         | 3          | 0        | 77          |
| Dystocia 2nd stage                            | 13         | 16         | 3*         | 1          | 3         | 0         | 33         | 0          | 0         | 0         | 2*        | 3          | 1        | 75          |
| Breech/abnormal lie                           | 1*         | 0          | 1*         | 1*         | 0         | 0         | 1*         | 91         | 55        | 7         | 26        | 1*         | 0        | 184         |
| Hypertension/preeclampsia/eclampsia           | 6          | 4          | 9          | 2          | 0         | 4         | 18         | 1          | 0         | 3         | 0         | 52         | 1        | 100         |
| IUGR                                          | 11         | 3          | 9          | 6          | 0         | 3         | 9          | 2          | 4         | 2         | 0         | 32         | 1        | 82          |
| APH/major placenta previa                     | 8          | 2          | 6          | 6          | 0         | 1         | 9          | 2          | 2         | 1         | 3*        | 27         | 1        | 68          |
| Prelabour diagnosis of CPD                    | 25         | 3          | 14         | 0          | 0         | 3         | 7          | 0          | 0         | 2         | 1*        | 2          | 0        | 57          |
| History of subfertility/bad obstetric history | 14         | 0          | 16         | 0          | 0         | 2         | 0          | 5          | 0         | 0         | 1*        | 9          | 0        | 47          |
| Cardiac disease                               | 7          | 0          | 9          | 2          | 0         | 7         | 10         | 1          | 1         | 1         | 0         | 7          | 0        | 45          |
| Maternal request                              | 8          | 0          | 10         | 1          | 0         | 3         | 21         | 0          | 0         | 0         | 0         | 0          | 0        | 43          |
| Multiple pregnancies                          | 0          | 0          | 1          | 0          | 0         | 0         | 1*         | 0          | 0         | 37        | 0         | 1*         | 0        | 40          |
| Diabetes                                      | 5          | 0          | 2          | 2          | 1         | 1         | 7          | 0          | 1         | 0         | 0         | 6          | 0        | 25          |
| Thick meconium                                | 10         | 4          | 1          | 1          | 0         | 0         | 0          | 0          | 0         | 0         | 0         | 0          | 0        | 16          |
| Pre-term                                      | 0          | 0          | 3*         | 0          | 0         | 1*        | 4*         | 0          | 0         | 1         | 0         | 1          | 0        | 10          |
| Other                                         | 22         | 3          | 23         | 11         | 4         | 10        | 10         | 1          | 1         | 3         | 5         | 24         | 1        | 118         |
| Missing                                       | 2          | 0          | 1          | 1          | 0         | 1         | 2          | 0          | 0         | 0         | 0         | 0          | 0        | 7           |
| <b>Total</b>                                  | <b>314</b> | <b>300</b> | <b>158</b> | <b>105</b> | <b>81</b> | <b>49</b> | <b>666</b> | <b>114</b> | <b>90</b> | <b>63</b> | <b>47</b> | <b>258</b> | <b>6</b> | <b>2251</b> |

Note: \* Possible groups misclassifications;

Abbreviation: APH= Antepartum haemorrhage; CPD= Cephalopelvic disproportion; CTG= Cardiotocography; IUGR= Intrauterine growth restriction.

**Key findings and comments:**

Indications for CS in Group 1:

- Abnormal CTG = 49.4%
- Potentially inappropriate indications (antepartum diagnosis of CPD, bad obstetric history, subfertility, maternal request) = 15%
- Dystocia = 12.7%

Indications for CS in Group 2a:

- Abnormal CTG = 58.3%
- Failed induction = 21%
- Dystocia = 14.3%

Indications for CS in Group 2b:

- Abnormal CTG = 30.4%
- Potentially inappropriate indications (antepartum diagnosis of CPD, bad obstetric history, subfertility, maternal request) = 25%

Indications for CS in Group 3:

- Abnormal CTG = 57.1%
- Dystocia = 8.5%

Indications for CS in Group 4a:

- Abnormal CTG = 60.5%
- Failed induction = 25.9%
- Dystocia = 7.4%

Indications for CS in Group 4b:

- Abnormal CTG = 18.4%
- Maternal/foetal issues = 32.6%
- Other = 20.4%

Indications for CS in Group 5:



- Previous CS = 70.1%
- Abnormal CTG = 7.4%
- Dystocia = 5.4%
- Maternal request = 3.2%

Indications for CS in Group 8:

- Multiple pregnancy = 58.7%
- Breech/abnormal lie = 11.1%

Indications for CS in Group 10:

- Maternal/fetal issues (preeclampsia/diabetes/maternal cardiac diseases/IUGR/APH) 48.1%
- Abnormal CTG 18.6%
